# Supplementary material for: One stone two birds: a sinter-resistant TiO2 nanofiber-based unbroken mat enables PM capture and in situ elimination
Source: Royal Society of Chemistry journal article supplement (doi:10.1039/d1nr06582c), 2021-01-01
Supplement: d1nr06582c4.pdf [file d1nr06582c4.pdf]

## Supplementary information

### **One stone two birds: a sinter-resistant TiO<sub>2</sub> nanofiber-based unbroken mat enables PMs capture and *in situ* elimination**

Wanlin Xu,<sup>†,§</sup> Wanlin Fu,<sup>†,§</sup> Xiangyu Meng,<sup>†,§</sup> Mingyu Tang,<sup>†</sup> Chaobo Huang,<sup>‡</sup> Yueming Sun,<sup>†</sup> Yunqian Dai<sup>†,\*</sup>

<sup>†</sup>School of Chemistry and Chemical Engineering, Southeast University, Nanjing, Jiangsu 211189, P. R. China

<sup>‡</sup>Jiangsu Key Lab of Biomass-based Green Fuels and Chemicals, College of Chemical Engineering, Nanjing Forestry University, Nanjing, Jiangsu 210037, P. R. China

\*Corresponding author. E-mail: [daiy@seu.edu.cn](mailto:daiy@seu.edu.cn)

§These authors contributed equally to this work.

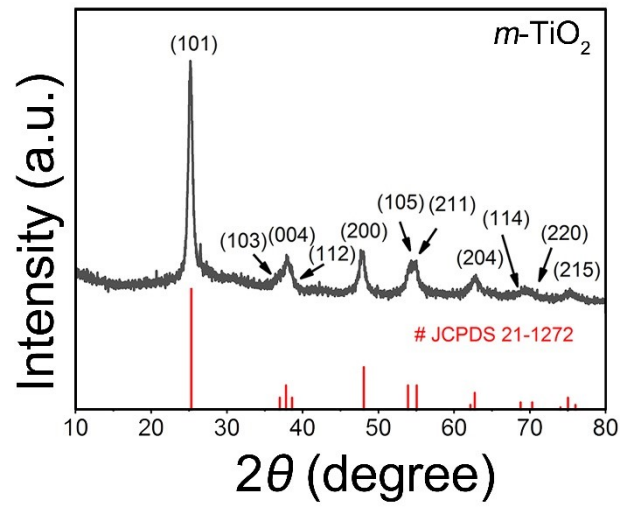

**Fig. S1** XRD patterns of  $m\text{-TiO}_2$  nanofibrous mats.

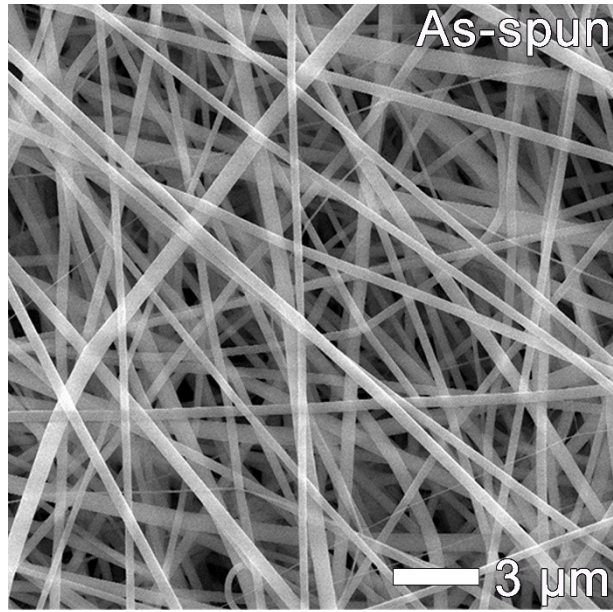

**Fig. S2** SEM image of the as-spun composite mat.

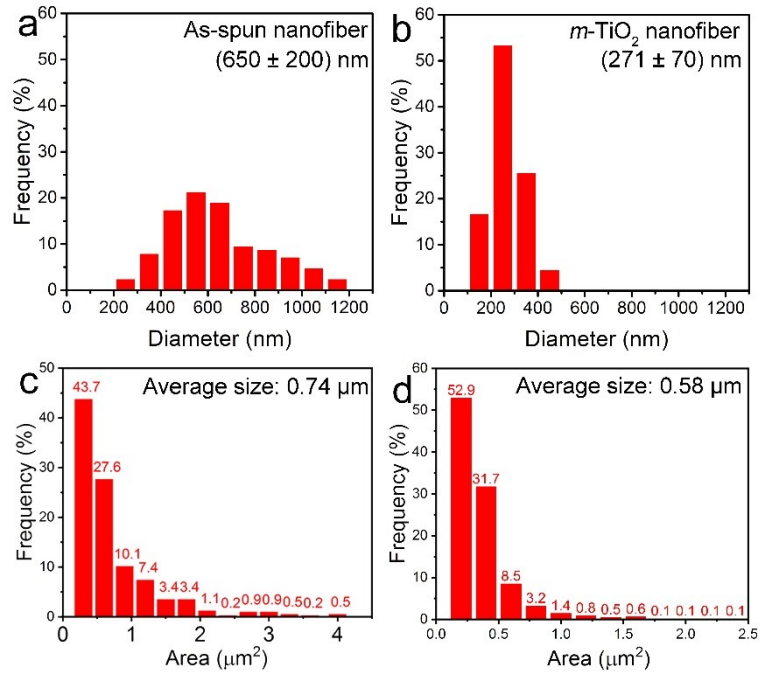

**Fig. S3** (a, b) Diameter distribution and (c, d) area distribution of the as-spun composite mat in Fig. S2 and the  $m$ -TiO<sub>2</sub> mat in Fig. 1f.

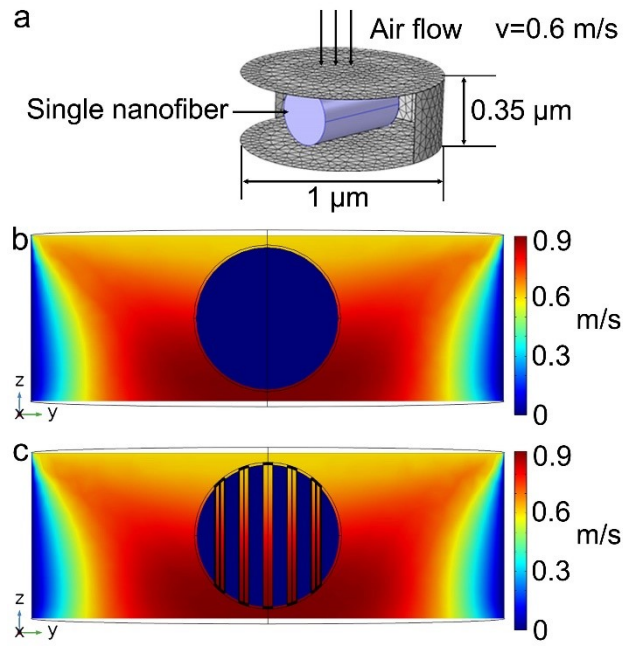

**Fig. S4** (a) The model used in airflow simulation. (b) and (c) are the air-flowing rate distribution of single non-porous nanofiber and porous nanofiber, respectively.

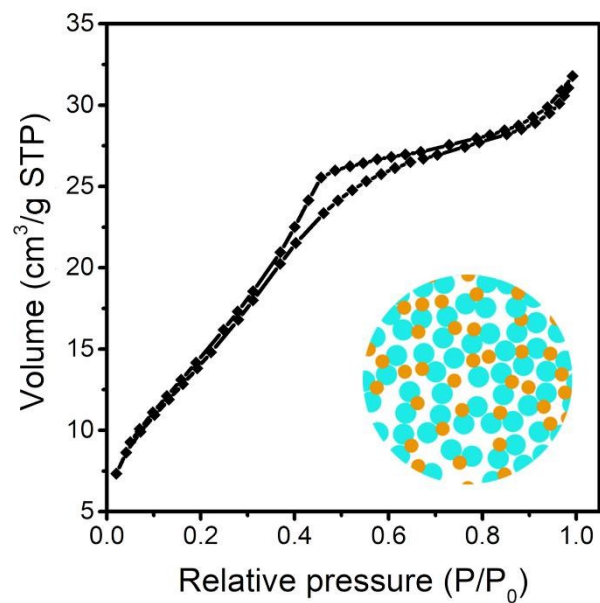

**Fig. S5** The nitrogen adsorption-desorption isotherms of the *m*-TiO<sub>2</sub> nanofibers. The inset is the schematic diagram of intra-fiber pores.

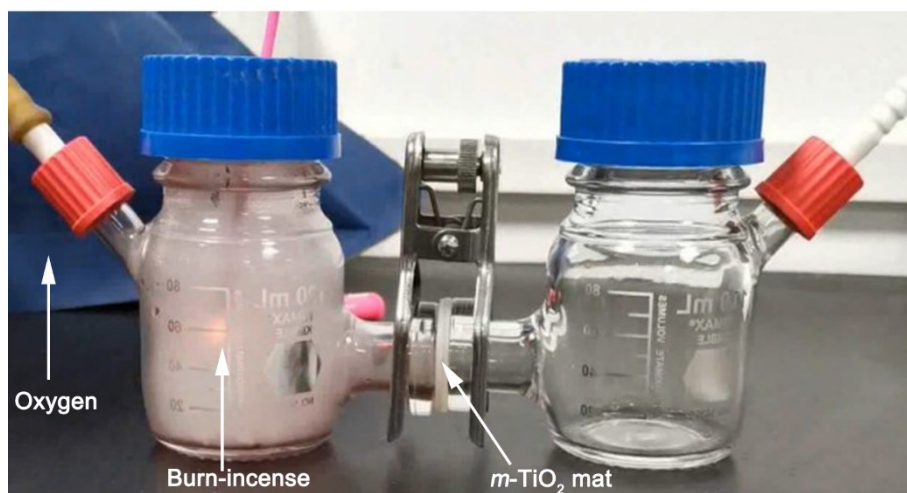

**Fig. S6** Optical image of burn-incense filtration setup.

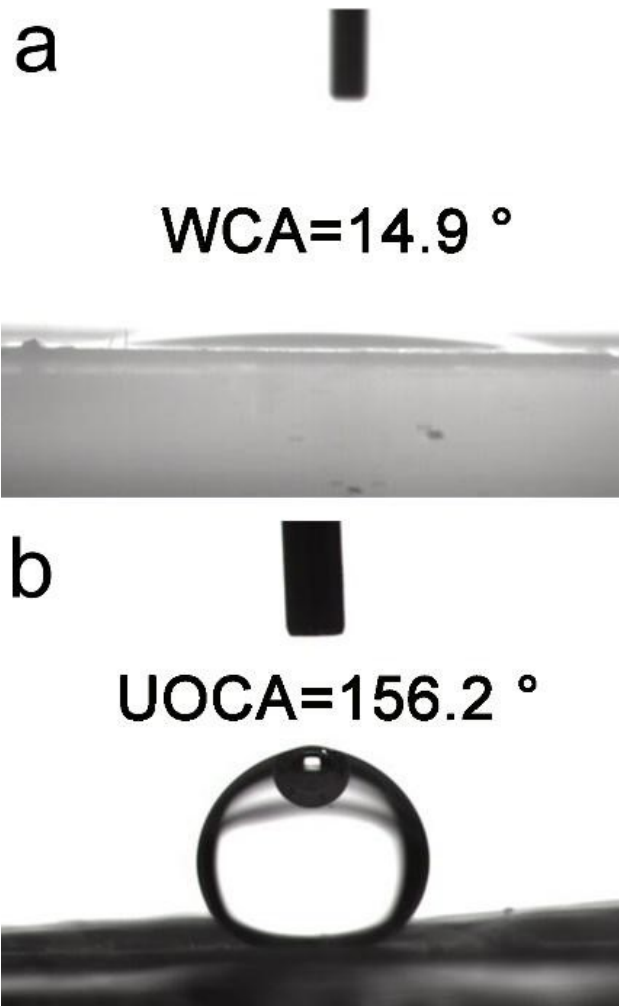

**Fig. S7** (a) Water contact angle (WCA) and (b) underwater oil contact angle (UOCA) of the *m*-TiO<sub>2</sub> mat.



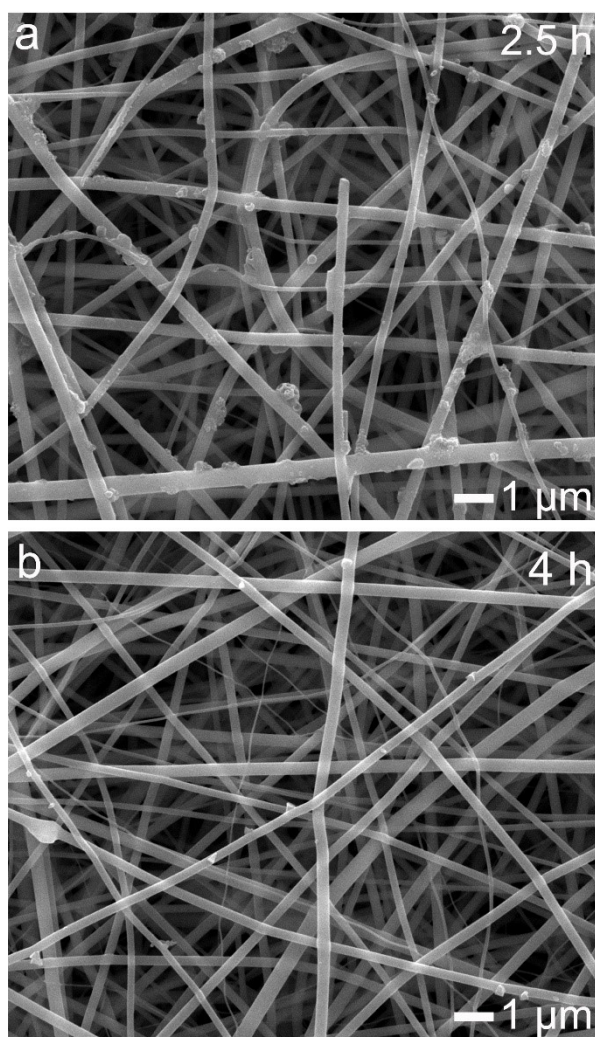

**Fig. S8** SEM images of the  $m\text{-TiO}_2$  mats with burned incense under sunlight irradiation for (a) 2.5 and (b) 4 h.

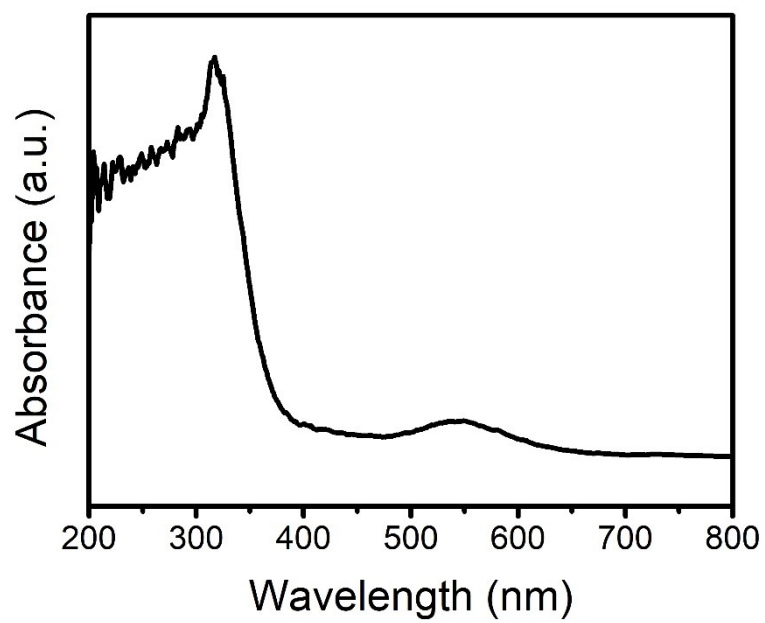

**Fig. S9** UV-vis spectrum of the Au@m-TiO<sub>2</sub> mat.

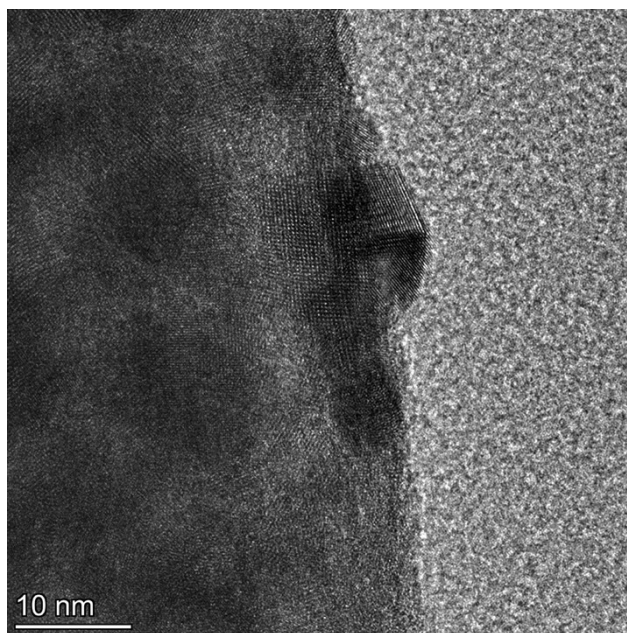

**Fig. S10** The pristine uncolored HRTEM image of the Au@m-TiO<sub>2</sub> nanofiber in Fig. 4(d).

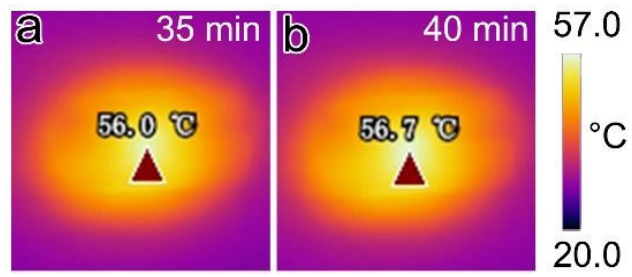

**Fig. S11** Infrared image of the *m*-TiO<sub>2</sub> mat under one Sun irradiation for (a) 35, and (b) 40 min.

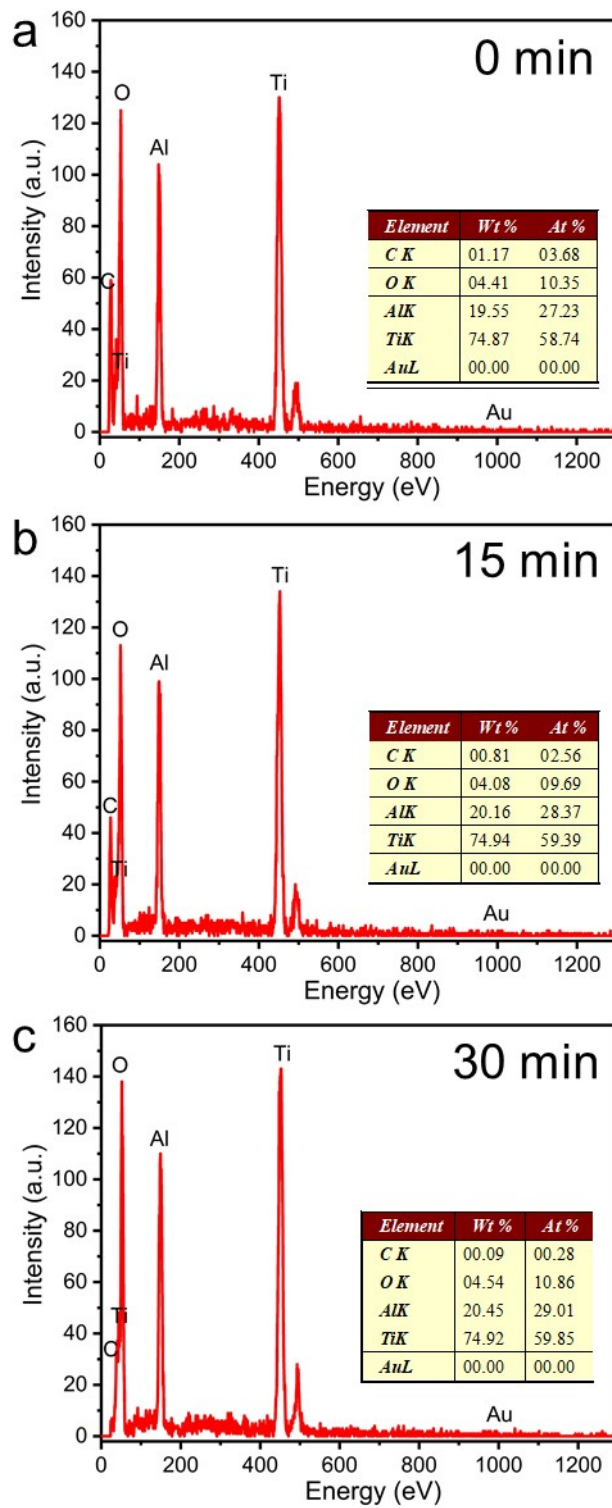

**Fig. S12** The EDX spectra of cigarette-polluted Au@m-TiO<sub>2</sub> mat before (a) and after being sunlight irradiation-treated (2.2 Sun) for 15 (b) and 30 (c) min.

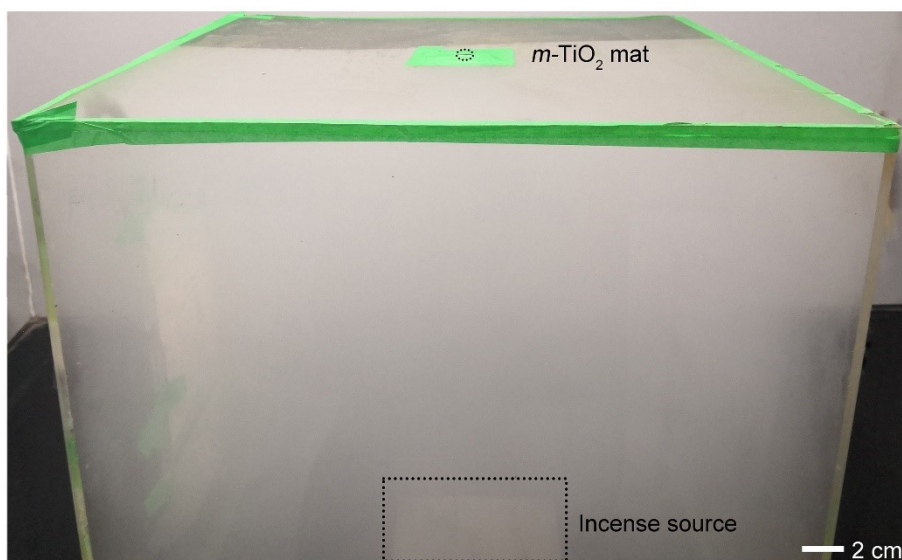

**Fig. S13** The optical image of the filtration setup for the long-term test.

**Movie. S1** The folding process of the  $m\text{-TiO}_2$  mat.

**Movie. S2** The recording of the  $m\text{-TiO}_2$  mat upon heating on an alcohol lamp for 60 s.

**Movie. S3** The recording of the  $m\text{-TiO}_2$  mat upon heating on a butane blowtorch for 60 s.
